# Supplementary material for: Semicoordinated allelic-bursting shape dynamic random monoallelic expression in pregastrulation embryos
Source: PubMed Central journal article supplement — iScience. 2021 Aug 5;24(9):102954. doi: 10.1016/j.isci.2021.102954 (PMC8379509; doi:10.1016/j.isci.2021.102954), 2021-08-05
Supplement: mmc1.pdf [file mmc1.pdf]

**iScience, Volume 24**

**Supplemental information**

**Semicoordinated allelic-bursting shape  
dynamic random monoallelic expression  
in pregastrulation embryos**

**Hemant Chandru Naik, Kishore Hari, Deepshikha Chandel, Susmita Mandal, Mohit Kumar  
Jolly, and Srimonta Gayen**

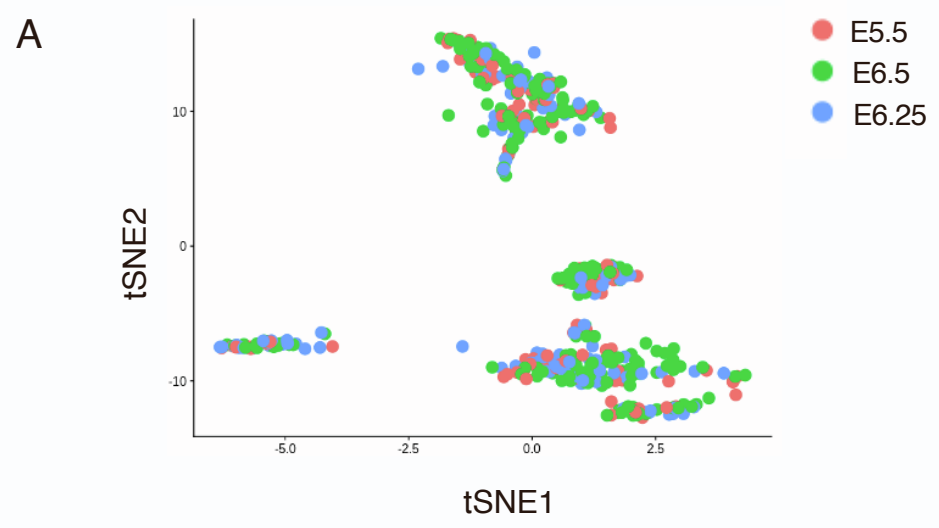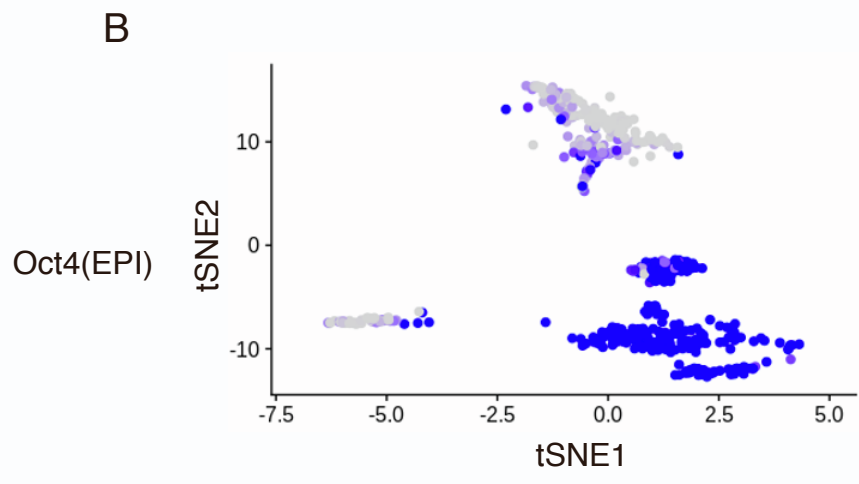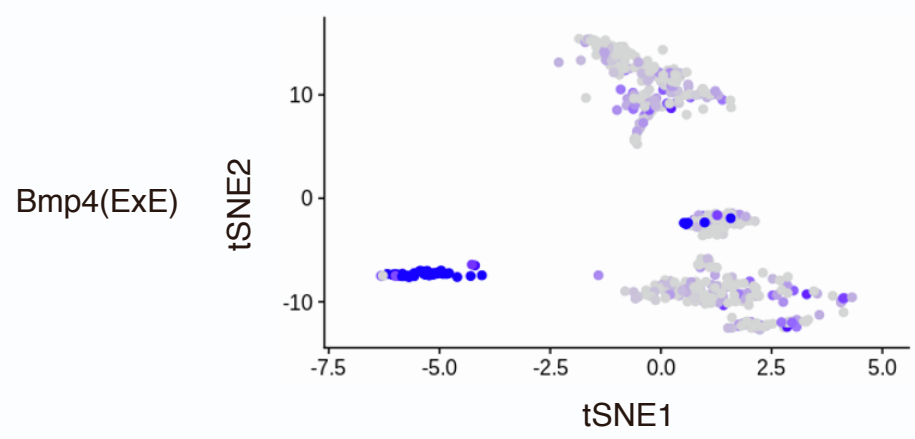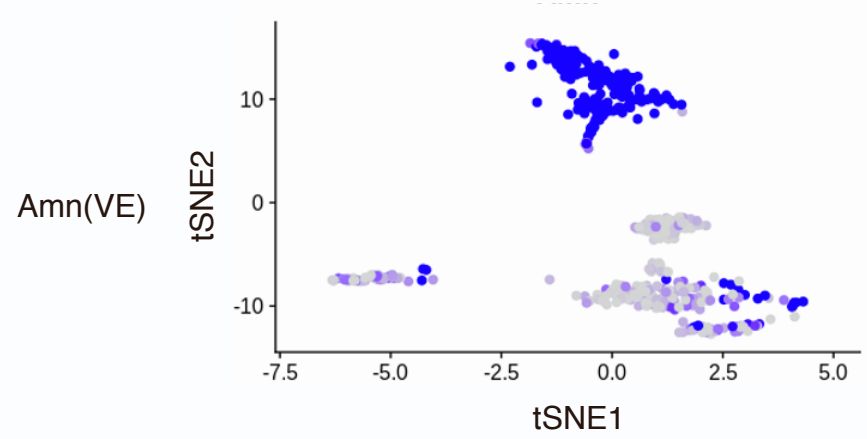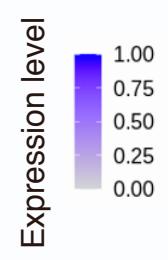

**Figure S1: Lineage profiling of pre-gastrulation mouse embryos based on single cell transcriptomics. Related to Figure 1.** (A) Clustering of all cells (n=510) from the three different stages (E5.5, E6.25 and E6.50) into two principal dimensions using t-SNE analysis based on 3000 most variable genes. (B) Representation of lineage specific marker expression of the clustered cells generated in t-SNE plot: Pou5f1 for EPI, Bmp4 for ExE and Amn for VE.



**Figure S2: Expression of *XIST* from paternal X-chromosome and X-linked genes from maternal X-chromosome in E6.5 female VE cells. Related to Figure 1.** Female VE cells undergo imprinted X-inactivation and therefore paternal X-chromosome is chosen as the inactive-X chromosome. *XIST* long noncoding RNA exclusively expresses from the inactive-X chromosome. (A) As expected, we found in almost all cells except few, allelic expression of *XIST* originated from paternal-X chromosome. (B) Profiling allelic expression of X-linked genes from maternal allele, showed >90% of expression from the active maternal-X chromosome almost in all cells and thus validating the accuracy of the allelic expression analysis method.

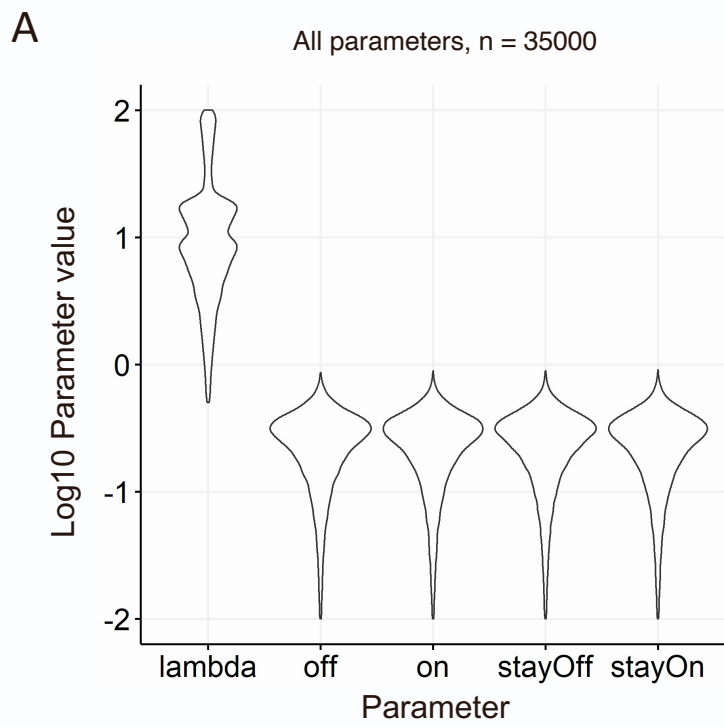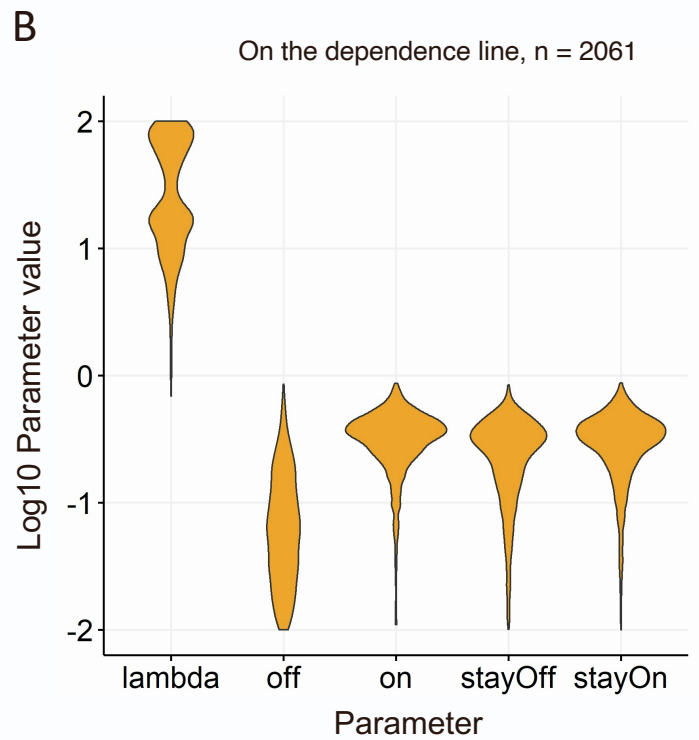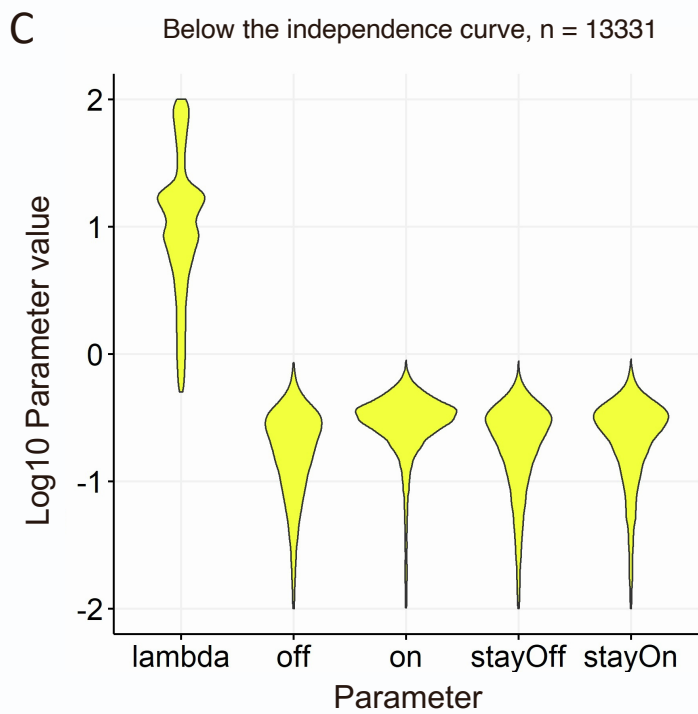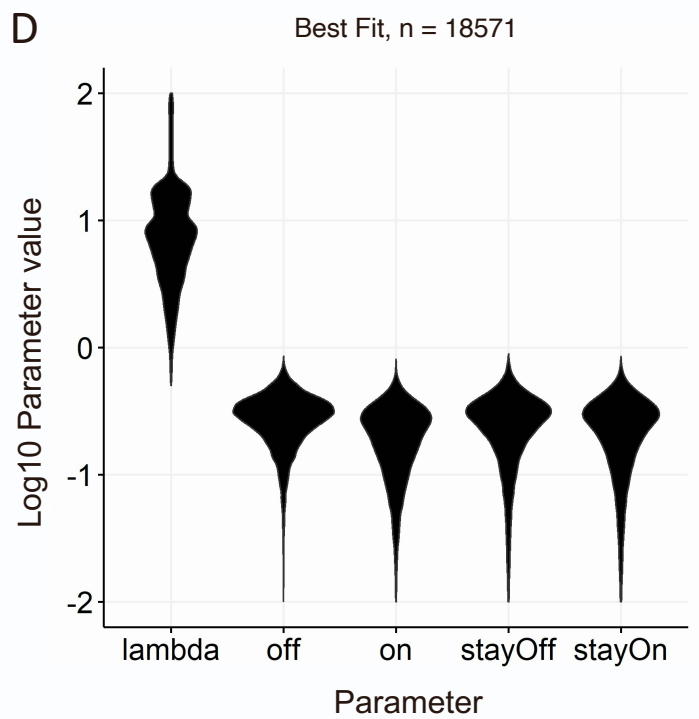

**Figure S3, Related to Figure 4:** (A) Violin plots showing distributions from which each of the five parameters were sampled. (B) Parameter distribution for the genes represented with orange dots (strong dependence) in Figure 4B. (C) Parameter distribution for the genes represented with yellow dots (below the theoretical independence curve) in Figure 4B. (D) Parameter distribution for the genes represented with black dots (genes lying between the two theoretical curves) in Figure 4B.

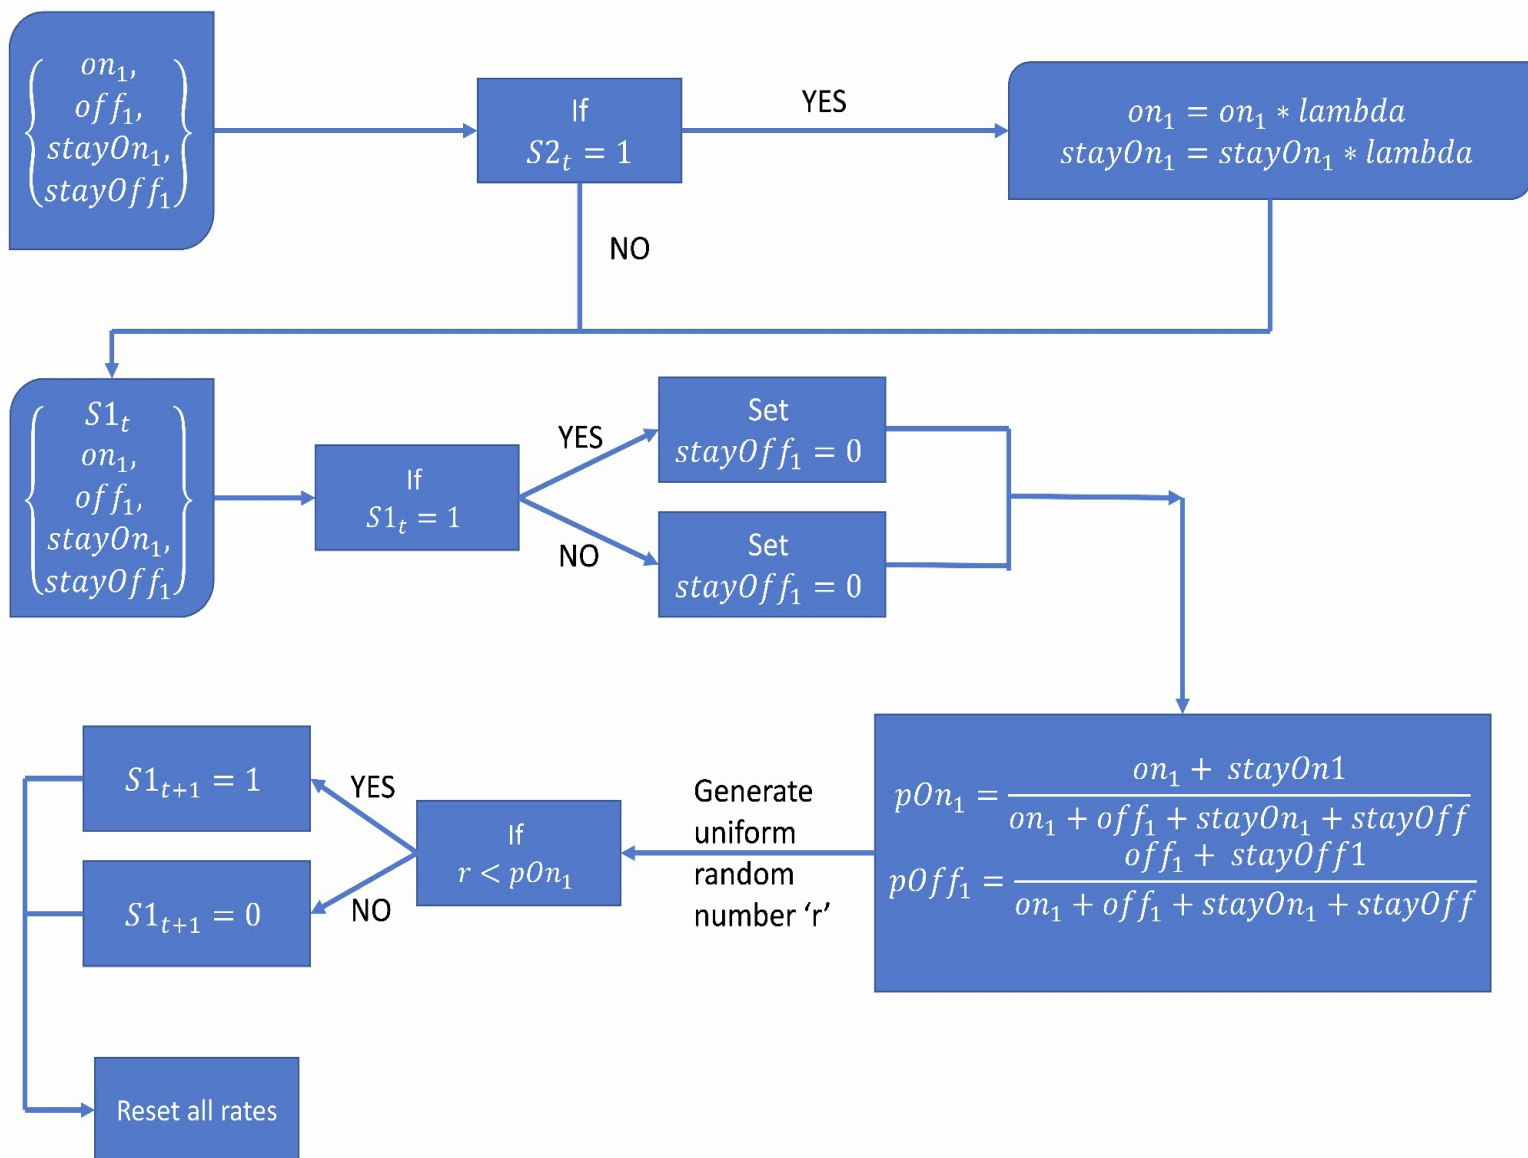



**Figure S4, related to Figure 4:** The model describes a gene with two alleles, with identical parameters. The simulation algorithm is described in the flow chart for one allele. The allele is described by the parameters {on1, off1, stayOn1, stayOff1}. At the beginning of the simulation, each of these parameters are sampled from a uniform distribution ranging from 0 to 1. The on/off state of the alleles at any given time  $t$  is given by  $\{S1t, S2t\}$ . The dependence parameter  $\lambda$  is sampled from a uniform distribution ranging from 0.01 to 100.
